# Supplementary material for: Development of a Meiosis Concept Inventory
Source: Atypon-hosted journal article supplement (doi:10.1187/cbe.12-10-0174), 2013-12-01
Supplement: combinedsupmats1.pdf [file combinedsupmats1.pdf]

# Supplemental Material

CBE—Life Sciences Education

Kalas et al.

## APPENDIX

### Question 1 [select the best answer]

One of the characteristics that differentiates all haploid cells from all diploid cells is that

- a) haploid cells have half as many chromosomes than diploid cells.
- b) haploid cells have one full set of chromosomes while diploid cells have two.
- c) haploid cells' chromosomes have a different structure/shape from diploid cells' chromosomes.
- d) haploid cells have half the amount of DNA as diploid cells.

Expert answer: b

- Alternatives/misconceptions<sup>2</sup>:
- a)
    - i) The absolute number of chromosomes determines ploidy.
    - ii) Diploid cells always have more chromosomes than haploid ones, regardless of what species they come from; being haploid implies having fewer chromosomes.
  - c)
    - i) Haploid cells' chromosomes have an "I" shape/structure, diploid cells' chromosomes have an "X" structure (confusion between replicated vs. unreplicated chromosomes and ploidy).
  - d)
    - i) Total amount of DNA must be higher in  $2n$  than in  $1n$  cells.
    - ii) Unsure about what a "set of chromosomes" is, but convinced that the absolute amount of DNA or the number of chromosomes does not define ploidy.

|                                         |                      |
|-----------------------------------------|----------------------|
| Concept:                                | ploidy               |
| Bloom level:                            | II                   |
| Difficulty index <sup>1</sup> :         | 0.37                 |
| Discrimination index (D) <sup>1</sup> : | 0.38                 |
| D.E. <sup>1</sup> :                     | 0.50                 |
| Common incorrect answer <sup>2</sup>    | a (31%) <sup>3</sup> |

---

<sup>1</sup>Based on the answers of 193 1<sup>st</sup> year students when the item was used in a post-test.  
D.E.: discrimination efficiency.

<sup>2</sup>Compiled from 28 individual student interviews conducted as described by Adams and Wieman (2010).

<sup>3</sup>Percentage of students selecting this answer in our sample (N=193).

**Question 4 [select all that apply]**

One or more of the cells represented below are haploid. Which one is it/which ones are they?

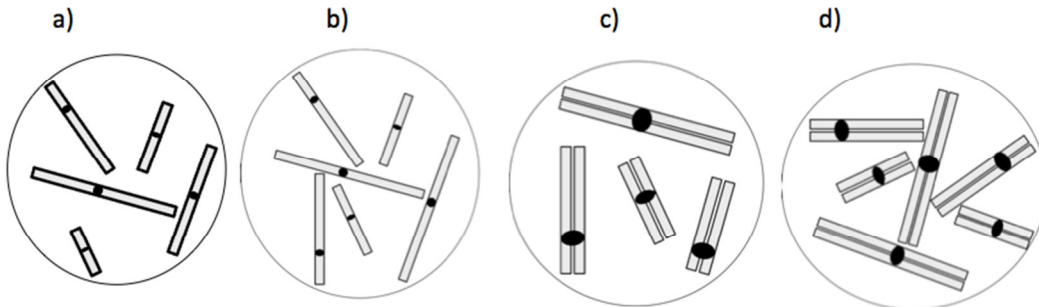

Expert answer: a+c

- Alternatives/misconceptions:
- a) i) Cells with an odd number of chromosomes are always haploid, uncomfortable/unsure with all the others.  
NOTE: if students don't pay attention to the instructions ("check all that applies"), this is usually the answer they choose.
  - b) i) [RARE] Haploid cells can't have chromosomes composed of two sister chromatids, and cells should not have odd numbers of chromosomes.
  - a+b) i) Haploid cells can't have chromosomes composed of two sister chromatids.  
ii) Confusion between sister chromatids and homologous chromosomes (if there are sister chromatids, then the cell must be diploid).
  - a+b+c) i) A cell is haploid if its chromosomes are not composed of sister chromatids, but also if there aren't chromosome pairs. [As long as there are even numbers of each chromatid, the cell is diploid].

Concept: ploidy  
 Bloom level: III  
 Difficulty index<sup>2</sup>: 0.54  
 D: 0.77  
 D.E.<sup>2</sup>: 0.83  
 Common incorrect answers<sup>2</sup> a+b (23%)<sup>3</sup>

**Question 5 [select all the answers that apply]**

One or more of the cells represented below are diploid. Which one is it/which ones are they?

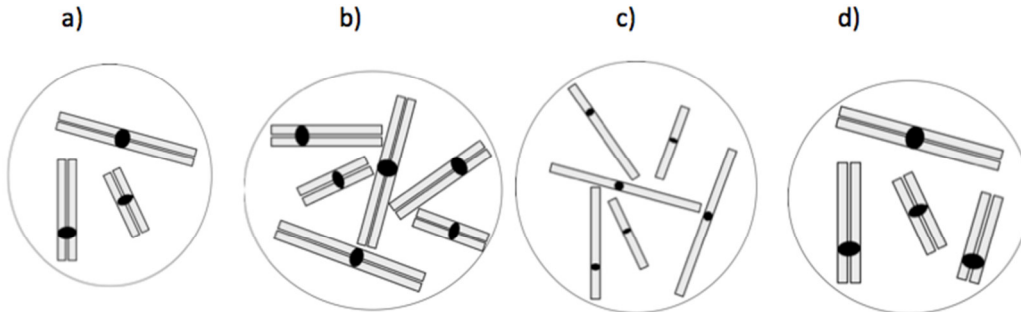

Expert answer: b+c

- Alternatives/misconceptions:
- b) i) Diploid cells have pairs of homologous chromosomes ( $\surd$ ), chromosomes always have an “X” structure.
  - c) i) Diploid cells have pairs of homologous chromosomes ( $\surd$ ), but when chromosomes have sister chromatids “they don’t count” because otherwise “cells would always be diploid” [ploidy can only be determined when there are no sister chromatids].
  - b+d) i) A diploid cell is one where chromosomes are composed of sister chromatids, but it can’t have an odd number [of chromosomes].
  - a+b+d) i) A cell is diploid if its chromosomes are composed of sister chromatids.
  - b+c+d) As long as there are pairs of “matching chromatids”, the cell is diploid [“matching chromatids” can be two sister chromatids or two pre-replication homologous chromosomes; students refer to what I called “matching chromatids” as “matching chromosomes” in both cases].

Concept: ploidy  
 Bloom level: III  
 Difficulty index: 0.48  
 D: 0.81  
 D.E.: 0.84  
 Common incorrect answers<sup>2</sup>

a+b+d (20%)<sup>3</sup>, b+c+d (13%)<sup>3</sup>, overall 41%<sup>3</sup> of the answers included “d”.
